# Supplementary material
Source: ML conference proceedings conference paper supplement (https://proceedings.neurips.cc/paper_files/paper/2023/hash/20e6b4dd2b1f82bc599c593882f67f75-Abstract.html)
Supplement: Supplementary file 1 [file 20e6b4dd2b1f82bc599c593882f67f75-Supplemental-Conference.pdf]

## 655 A Appendix

### 656 A.1 Learning Curves

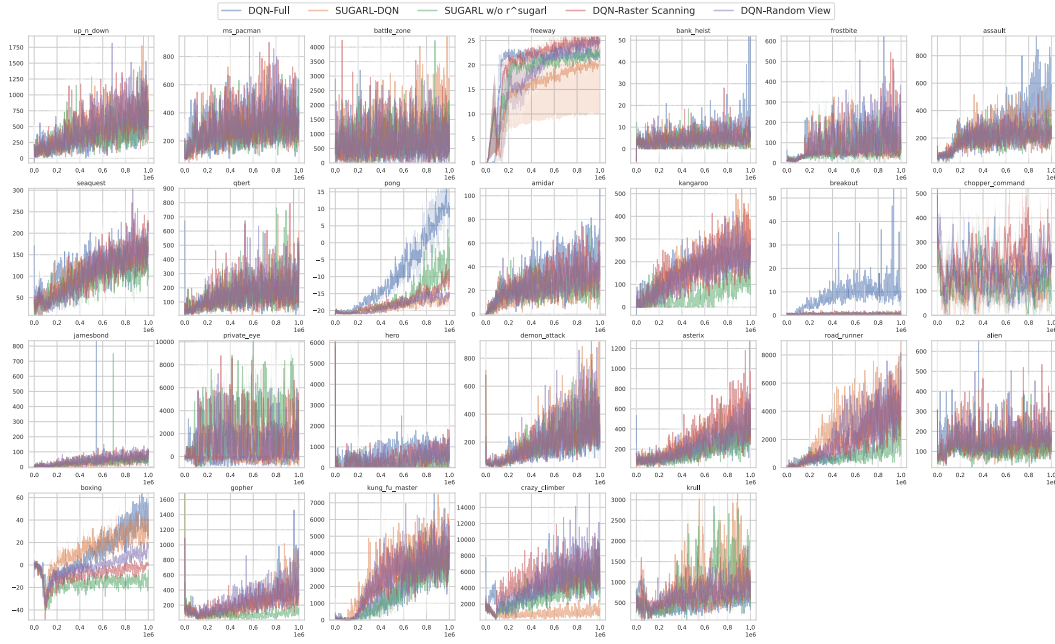

Figure 8: Learning curves of 26 Atari games, under the setting of 50x50 foveal observation size and 20x20 peripheral observation.

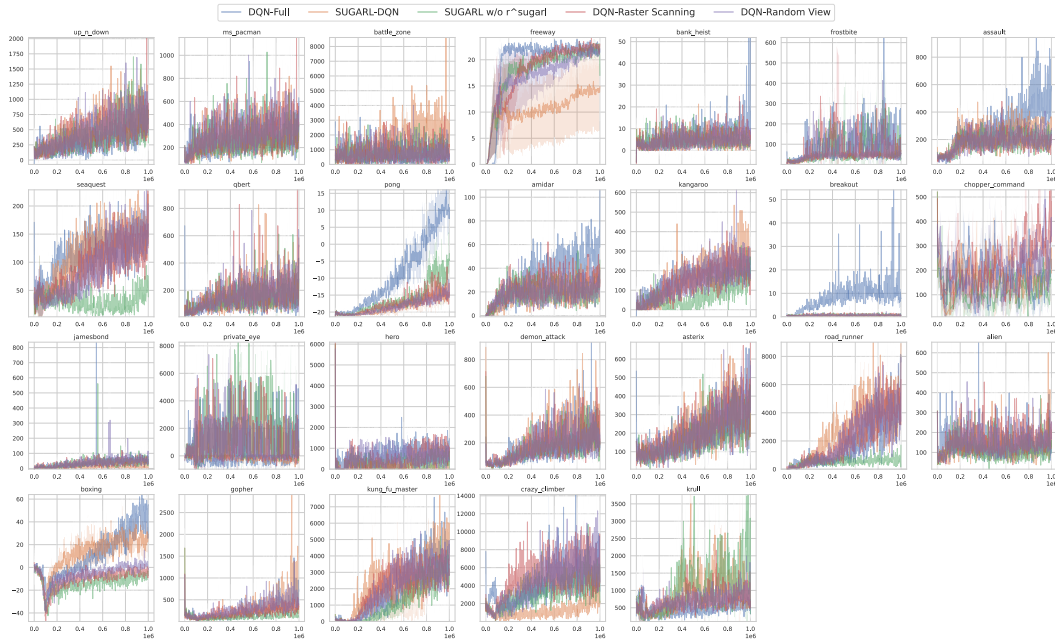

Figure 9: Learning curves of 26 Atari games, under the setting of 30x30 foveal observation size and 20x20 peripheral observation.

### 657 A.2 Hyper-parameter Settings

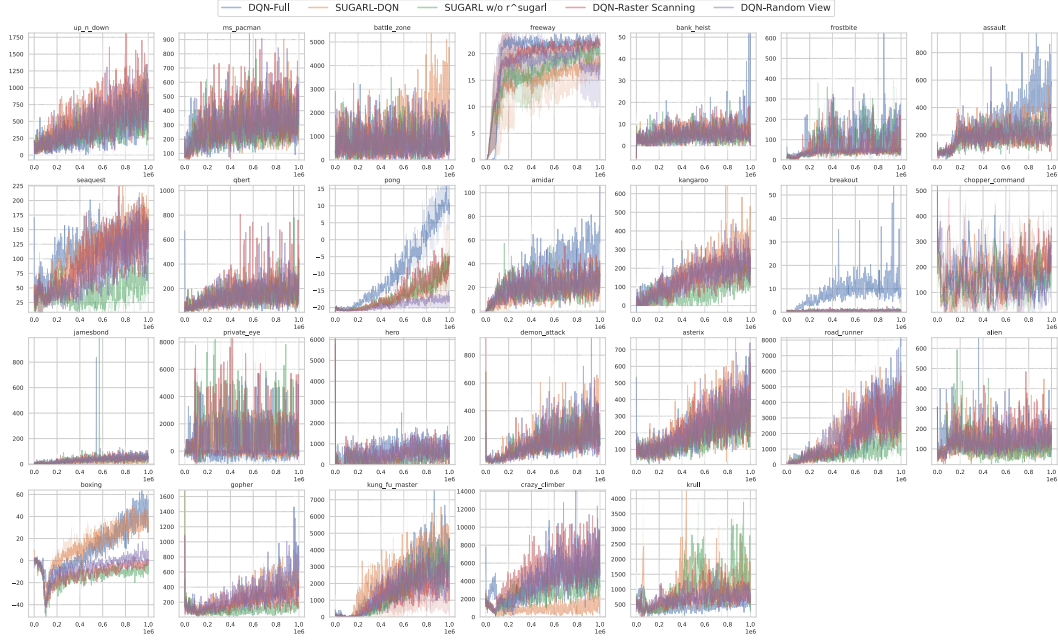

Figure 10: Learning curves of 26 Atari games, under the setting of 20x20 foveal observation size and 20x20 peripheral observation.

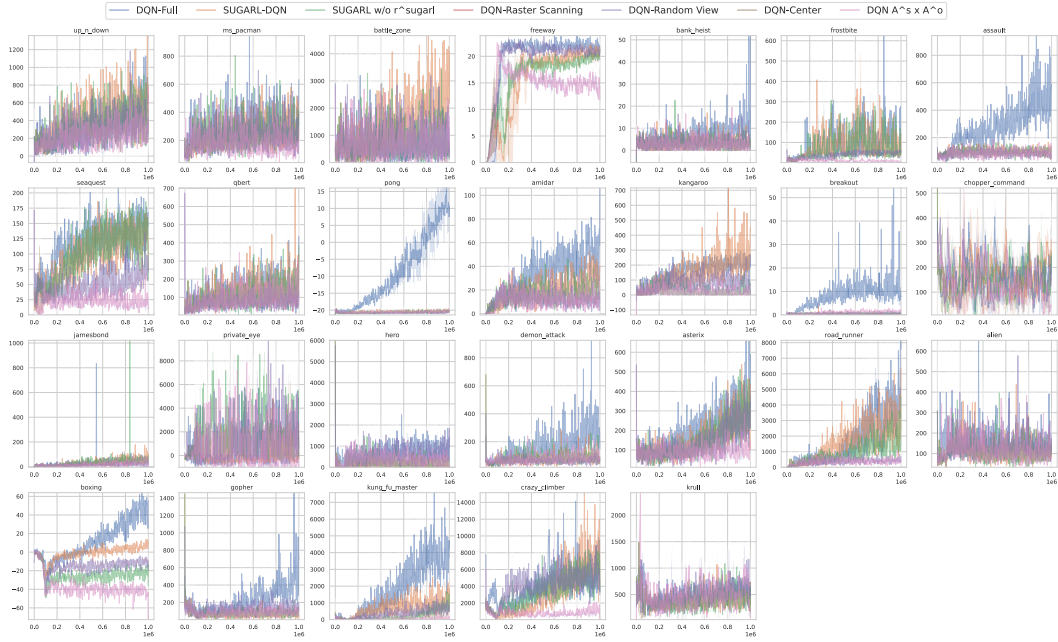

Figure 11: Learning curves of 26 Atari games, under the setting of 50x50 foveal observation size and w/o peripheral observation.

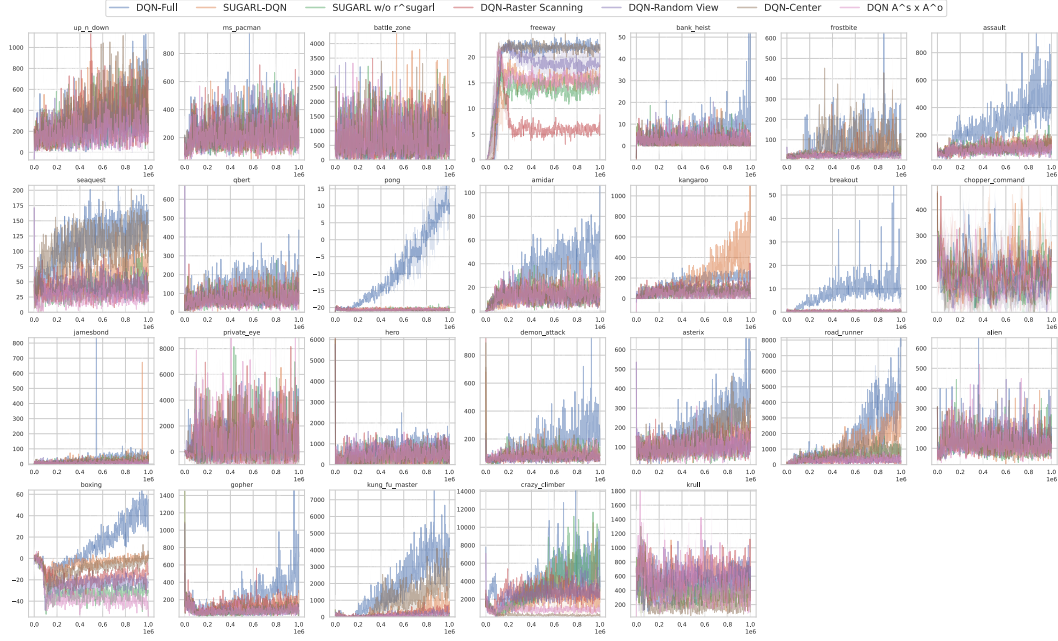

Figure 12: Learning curves of 26 Atari games, under the setting of 30x30 foveal observation size and w/o peripheral observation.

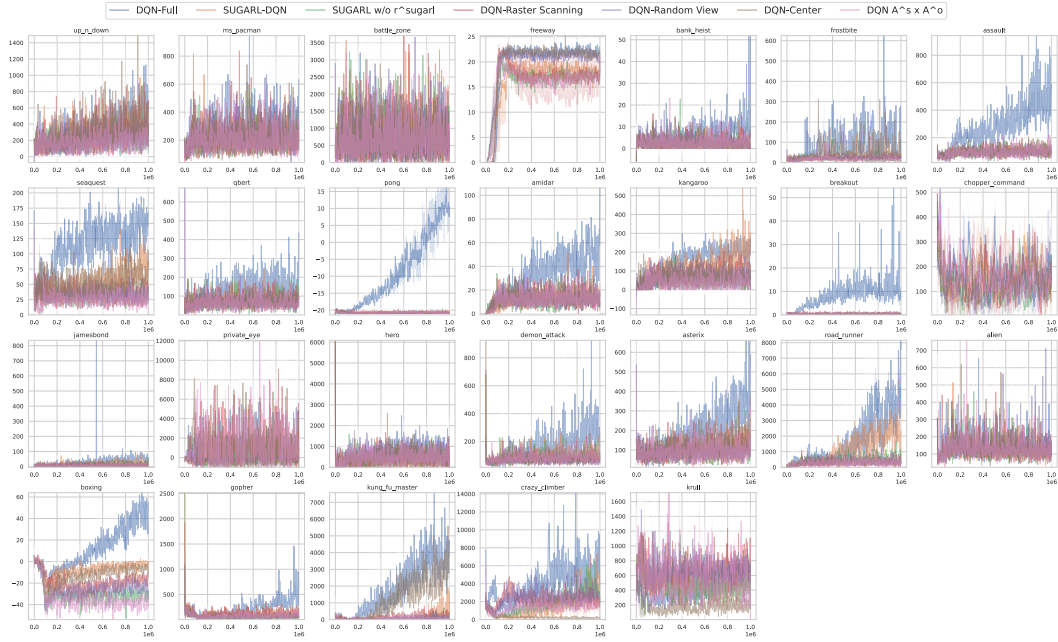

Figure 13: Learning curves of 26 Atari games, under the setting of 20x20 foveal observation size and w/o peripheral observation.

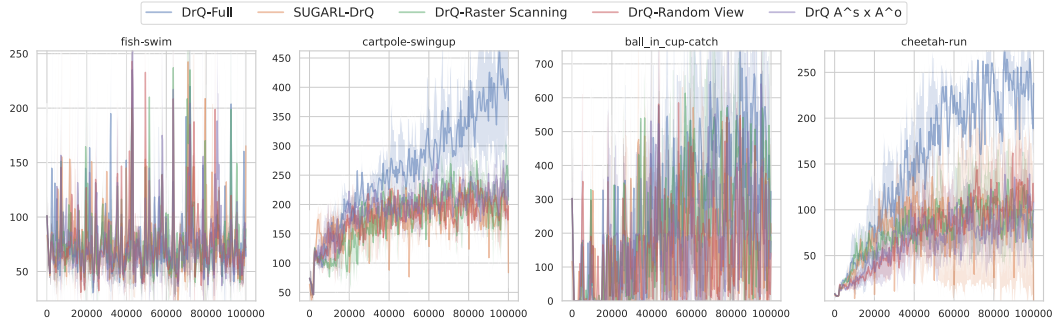

Figure 14: Learning curves of 4 DMC environments, under the setting of 50x50 foveal observation size and w/o peripheral observation.

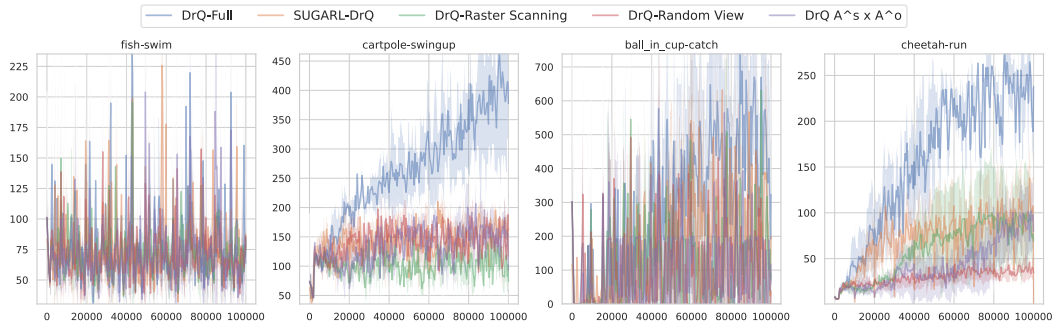

Figure 15: Learning curves of 4 DMC environments, under the setting of 30x30 foveal observation size and w/o peripheral observation.

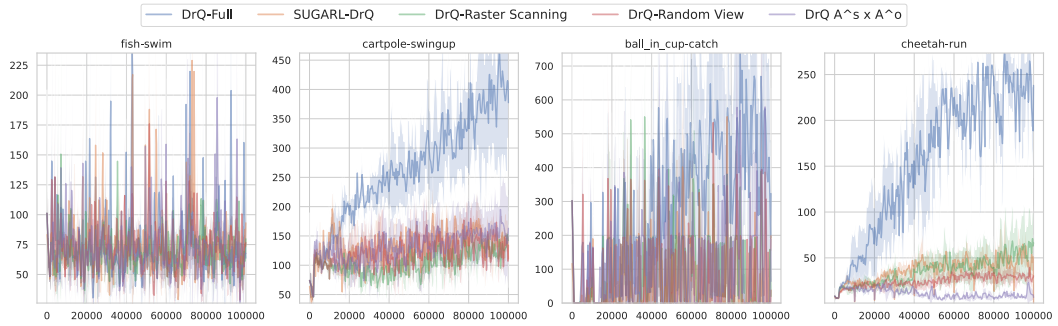

Figure 16: Learning curves of 4 DMC environments, under the setting of 20x20 foveal observation size and w/o peripheral observation.

Table 5: Hyper-parameters for DQN / SUGARL-DQN (on Atari)

|                                           |                        |
|-------------------------------------------|------------------------|
| Total steps                               | 1,000,000 or 5,000,000 |
| Replay buffer size                        | 100,000                |
| $\epsilon$ start                          | 1.0                    |
| $\epsilon$ end                            | 0.01                   |
| min $\epsilon$ step                       | 100,000                |
| $\gamma$                                  | 0.99                   |
| Learning start                            | 80,000                 |
| Q network train frequency                 | 4                      |
| Target network update frequency           | 1,000                  |
| Learning rate                             | $10^{-4}$              |
| Batch size                                | 32                     |
| Self-understanding module train frequency | 4                      |
| Self-understanding module learning rate   | $10^{-4}$              |

Table 6: Hyper-parameters for SAC (on Atari)

|                                           |                    |
|-------------------------------------------|--------------------|
| Total steps                               | 1,000,000          |
| Replay buffer size                        | 100,000            |
| $\gamma$                                  | 0.99               |
| Learning start                            | 80,000             |
| Actor train frequency                     | 4                  |
| Critic train frequency                    | 4                  |
| Target network update frequency           | 8,000              |
| Actor Learning rate                       | $3 \times 10^{-4}$ |
| Critic Learning rate                      | $3 \times 10^{-4}$ |
| Batch size                                | 64                 |
| Self-understanding module train frequency | 4                  |
| Self-understanding module learning rate   | $3 \times 10^{-4}$ |
| Visual policy alpha                       | 0.2                |
| Physical policy alpha                     | autotune           |
| Physical policy target entropy scale      | 0.2                |

Table 7: Hyper-parameters for DrQv2 (on DMC)

|                                                  |           |
|--------------------------------------------------|-----------|
| Total steps                                      | 100,000   |
| Replay buffer size                               | 100,000   |
| $\gamma$                                         | 0.99      |
| Standard deviation start                         | 1.0       |
| Standard deviation end                           | 0.1       |
| Standard deviation end step                      | 50,000    |
| Standard deviation clip                          | 0.3       |
| Learning start                                   | 2,000     |
| Actor train frequency                            | 2         |
| Critic train frequency                           | 2         |
| Target network update frequency                  | 2         |
| Target network exponential moving average weight | 0.01      |
| Actor Learning rate                              | $10^{-4}$ |
| Critic Learning rate                             | $10^{-4}$ |
| Batch size                                       | 256       |
| Self-understanding module train frequency        | 2         |
| Self-understanding module learning rate          | $10^{-4}$ |
| Multiple-step reward                             | 3         |

Table 8: Environment Settings

|                                  |                     |
|----------------------------------|---------------------|
| <b>Atari</b>                     |                     |
| Gray-scale                       | True                |
| Full observation size            | 84x84               |
| Frame stacking                   | 4                   |
| Action repeat (frame skipping)   | 4                   |
| Observable area initial location | (0, 0)              |
| Visual action options            | $4 \times 4$ grid   |
| Visual action space size         | 16 (abs) or 5 (rel) |
| PVM number of steps              | 3                   |
| <b>DMC</b>                       |                     |
| Gray-scale                       | True                |
| Full observation size            | 84x84               |
| Frame stacking                   | 3                   |
| Action repeat (frame skipping)   | 2                   |
| Observable area initial location | (0, 0)              |
| Visual action options            | $4 \times 4$ grid   |
| Visual action space size         | 5 (rel)             |
| PVM number of steps              | 3                   |
